# Supplementary material for: Point defect-reduced colloidal SnO2 electron transport layers for stable and almost hysteresis-free perovskite solar cells
Source: Royal Society of Chemistry journal article supplement (doi:10.1039/c9ra00366e), 2019-01-01
Supplement: c9ra00366e1.pdf [file c9ra00366e1.pdf]

Electronic Supplementary Information

**Point Defects-Reduced Colloidal SnO<sub>2</sub> Electron Transport Layers for Stable and Hysteresis Less Perovskite Solar Cells**

Yeonkyeong Ju,<sup>\*a</sup> So Yeon Park,<sup>\*a</sup> Hyun Soo Han,<sup>b</sup> and Hyun Suk Jung<sup>\*a</sup>

<sup>a</sup>School of Advanced Materials Science & Engineering, Sungkyunkwan University, Suwon 16419, Republic of Korea.

<sup>b</sup>Department of Mechanical Engineering, Stanford University, Stanford, USA.

<sup>\*</sup>These authors contributed equally.

Corresponding Author: Hyun Suk Jung (e-mail: [hsjung1@skku.edu](mailto:hsjung1@skku.edu))

## **Experimental section**

### **Materials**

Dimethylformamide (DMF, 99.8 %), Dimethyl sulfoxide (DMSO, 99.9 %), Chlorobenzene (CB, 99.8 %), Acetonitrile (99.8 %), 4-tert-butylpyridine (tBP, 96 %), Lithium bis(trifluoromethylsulfonyl)imide (Li-TFSI) and Cesium iodide (CsI) were purchased from Sigma-Aldrich. Also, all reagents for colloid SnO<sub>2</sub> synthesis and sol-gel SnO<sub>2</sub> ETL preparation were purchased from Sigma-Aldrich. Anhydrous 1-butanol (99 %) was purchased from Tokyo Chemical Industry Corporation. Lead iodide (PbI<sub>2</sub>) and Lead bromide (PbBr<sub>2</sub>) were purchased from Alfa Aesar. Formamidinium iodide (FAI) and Methylammonium bromide (MABr) were purchased from Xi'an Polymer Light Technology Corporation. 2,29,7,79-tetrakis(N,N-di-p-methoxyphenylamine)-9,9-spirobifluorene (Spiro-MeOTAD) was purchased from the Luminescence Technology Corp.

### **Synthesis of C-SnO<sub>2</sub> nanocrystals**

Colloidal SnO<sub>2</sub> (C-SnO<sub>2</sub>) nanocrystals were synthesized by the inverse micelle-water injection method according to previous methods.<sup>1</sup> In typical synthetic process, 1 mmol of tin acetate (Sn(CH<sub>3</sub>CO<sub>2</sub>)<sub>4</sub>), 10 mmol of oleylamine and 10 mmol of oleic acid were dissolved in 30 ml of xylene. The mixture was heated to 110 °C and kept the same temperature for 30 minutes under stirring to eliminate the water, and then cooled to 90 °C. Then, the 1ml of deionized water in the syringe was injected swiftly into the mixture solution at 90 °C. We further refluxed the cloudy solution at the same temperature until the solution became transparent, and the reaction solution was cooled to room temperature. The as-synthesized C-SnO<sub>2</sub> nanocrystals were purified by washing them with ethanol and subsequently centrifuging. The C-SnO<sub>2</sub> were redispersed in hexane.

## Solar cell fabrication

We cleaned the laser-etched ITO/glass substrates with acetone, distilled water, and ethanol in an ultrasonic bath for 15 min. Hexane was drop-casted during the spin-coating process for coating uniformity and annealed at 90 °C for 15 minutes<sup>1</sup>. The colloidal SnO<sub>2</sub> (C-SnO<sub>2</sub>) layer was spin-coated (4000 rpm for 30 s) on the cleaned ITO/glass substrate, using a diluted solution of colloidal SnO<sub>2</sub> nanoparticles in hexane (20 mg/ml). The SnO<sub>2</sub> film was prepared through the sol-gel method (S-SnO<sub>2</sub>): the precursor solution of 0.2 M SnCl<sub>2</sub>·2H<sub>2</sub>O in 1-butanol was spin-coated on the same ITO/glass substrate, at 3000 rpm for 30 s and annealed at 180 °C for 30 min. We prepared the perovskite precursor solutions (1.3M [CsPbI<sub>3</sub>]<sub>0.05</sub>[(FAPbI<sub>3</sub>)<sub>0.85</sub>(MAPbBr<sub>3</sub>)<sub>0.15</sub>]<sub>0.95</sub>) by dissolving corresponding amounts of PbI<sub>2</sub>, FAI, PbBr<sub>2</sub>, MABr, CsI in a DMSO/DMF (7:3 v/v) mixed solvent. After exposure to UV-Ozone irradiation for 20 min, we spin-coated the perovskite precursor solution on top of the deposited electron transfer layer with a 30 nm thickness (5000 rpm for 25 s); additionally, 0.5 ml of Anisole were dropped on the rotating substrate at 20 s. We heated sequentially the spin-coated substrates at 150 °C for 10 min. The thickness of resultant perovskite layer was around 580 nm. A hole transport layer solution consists of 36 mg spiro-OMeTAD, 14.4 μl 4-tert-butylpyridine, and 8.8 μl LiTF-SI solution (360 mg mL<sup>-1</sup> in acetonitrile) dissolved in 0.5 ml CB. 25 μl hole transport layer solution was coated by spin coating at 4000 rpm for 30s onto the perovskite thin film. A hole transport layer was obtained 130 nm thickness. The Ag electrode was deposited on the prepared samples using a thermal evaporation system, under a pressure of 10<sup>-6</sup> Torr.

## Characterization

The X-ray diffraction (XRD) patterns of the SnO<sub>2</sub> films were measured using a D8 Discover instrument with Cu-K $\alpha$  radiation ( $\lambda = 1.5418 \text{ \AA}$ ). The crystal lattice and the size of the C-SnO<sub>2</sub> sample were characterized using a high-resolution transmission electron microscope (HRTEM, JEM-3010, JEOL). Fourier-transform infrared spectra were obtained using an FT-IR, Nicolet 6700, Thermo Scientific: 32 scans were done at a resolution of 8, in the range of 600 and 4000 cm<sup>-1</sup>. X-ray photoelectron spectroscopy (XPS, ESCA-LAB250Xi, Thermo UK) was used to determine the chemical states on the substrate surfaces. The steady-state and time-resolved photoluminescence were observed with a fluorescence lifetime spectrometer (Quantaaurus-Tau C11367-12, HAMAMATSU) using a 464-nm laser (PLP-10, HAMAMATSU) for photoexcitation. We measured the absorbance spectrum of perovskite film on colloidal and sol-gel by ultraviolet visible (UV-Vis) spectroscopy (Perkin Elmer, Lamda 35). The current density-voltage (J-V) and the current density-time (J-T) characteristics under illumination at AM 1.5G (1.00 mA/cm<sup>2</sup>) were performed using a solar simulator (Newport Oriel Solar 3A class AAA, 64023A) and a potentiostat (CH instruments, CHI 660D). We adjusted the light intensity using a standard Si-solar cell (Oriel, VLSI standards) and a light sensor current controller (Newport Oriel, 68945). We covered all devices with a thin metal mask, which had an active area of 0.14 cm<sup>2</sup> during the measurements.

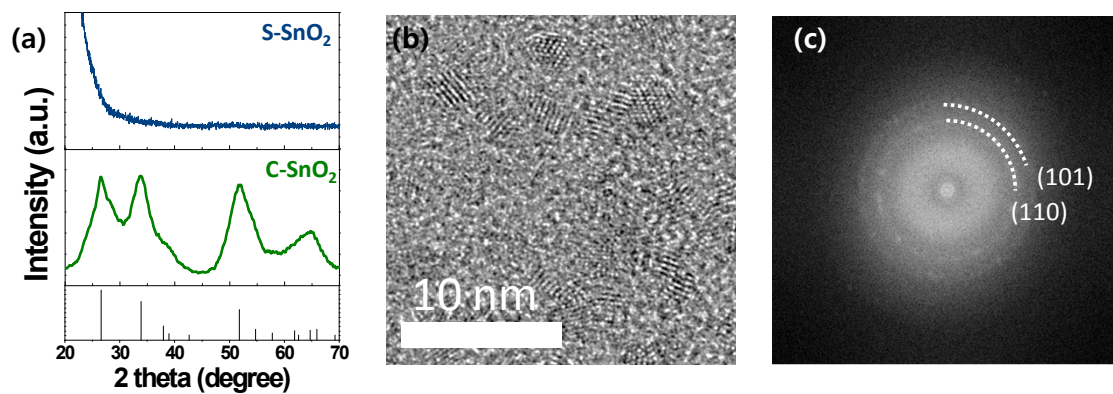

**Fig. S1.** (a) X-ray diffraction (XRD) patterns for S-SnO<sub>2</sub> and C-SnO<sub>2</sub>; (b) high-resolution transmission electron microscopy (TEM) image of C-SnO<sub>2</sub>; (c) reduced Fourier-transform pattern of C-SnO<sub>2</sub>.

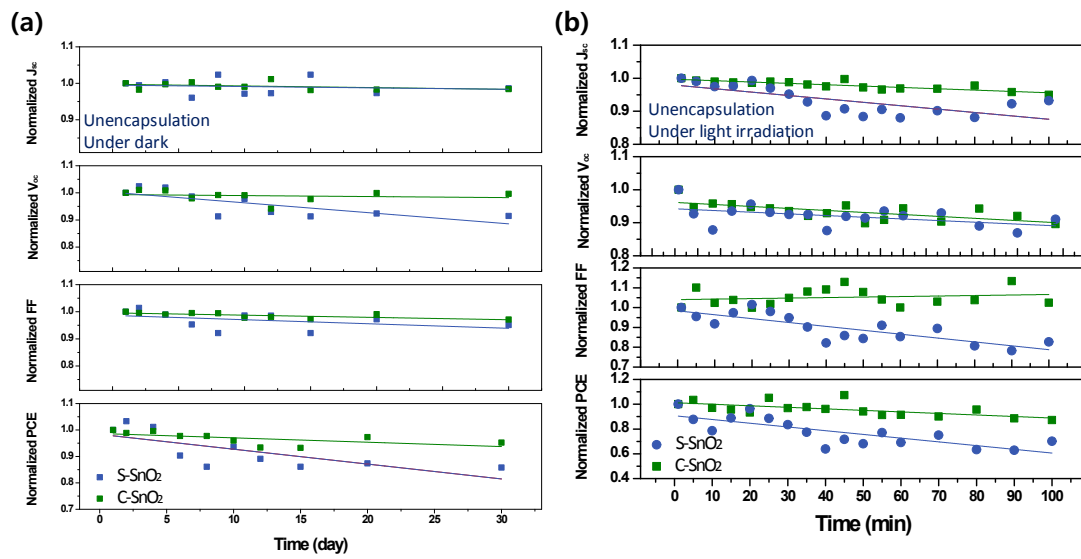

**Fig. S2.** Change in normalized  $J_{sc}$ ,  $V_{oc}$ , FF, and power conversion efficiency (PCE) of S-SnO<sub>2</sub>- and C-SnO<sub>2</sub>-based perovskite solar cells (a) under dark condition and (b) under light soaking condition (AM 1.5G) in below 20% humidity and 25 °C ambient air.

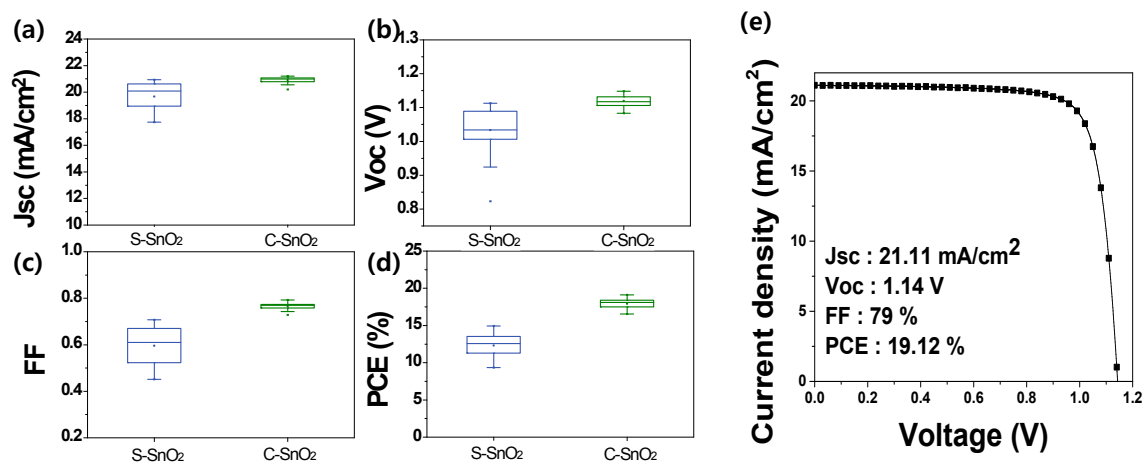

**Fig. S3.** Statistical photovoltaic parameters of (a) J<sub>sc</sub>, (b) V<sub>oc</sub>, (c) FF, and (d) PCE obtained from the S-SnO<sub>2</sub>- and C-SnO<sub>2</sub>- based PSCs; (e) J-V curves for the champion device based on the C-SnO<sub>2</sub> electron transport layer.

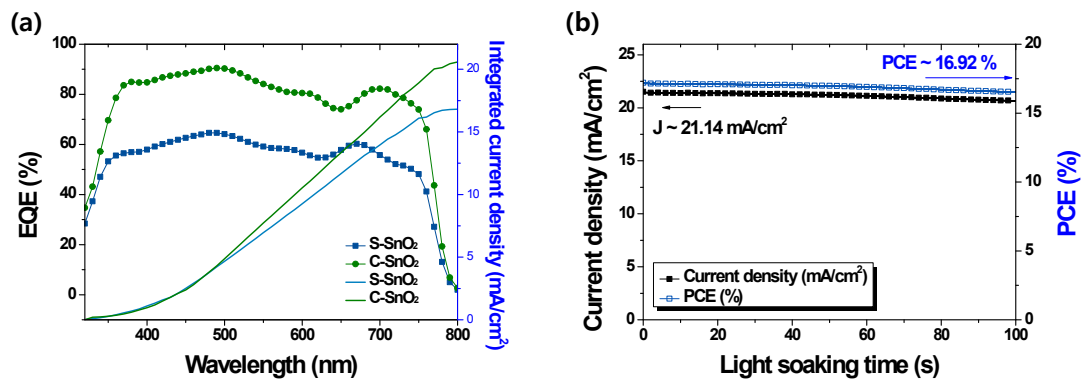

**Fig. S4.** (a) External Quantum efficiency (EQE) and integrated current density of devices with S-SnO<sub>2</sub> and C-SnO<sub>2</sub> ETLs, (b) Steady-state current and efficiency of PSCs employing C-SnO<sub>2</sub> ETL measured at forward bias 800 mV and stabilized power output under simulated AM 1.5G sunlight 100 mW cm<sup>-2</sup>



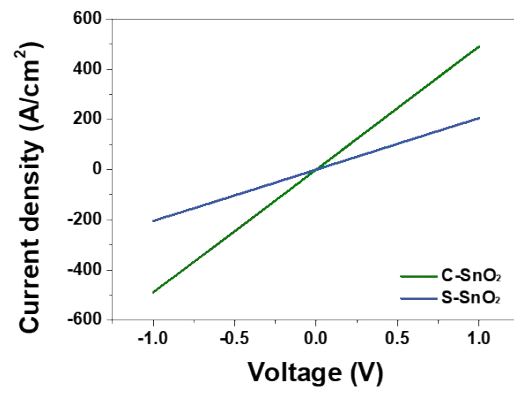

**Fig. S5.** J-V curves for S-SnO<sub>2</sub> and C-SnO<sub>2</sub> thin films obtained under dark condition.

**Table S1.** Parameters of the perovskite solar cells.

|                    |         | Voc<br>[V] | Jsc<br>[mA cm <sup>-2</sup> ] | FF<br>[%] | PCE(Max.)<br>[%] | Rs<br>[Ω] | Rsh<br>[kΩ] |
|--------------------|---------|------------|-------------------------------|-----------|------------------|-----------|-------------|
| S-SnO <sub>2</sub> | Reverse | 1.08       | 20.76                         | 76        | 16.45<br>(16.96) | 31.46     | 21.60       |
|                    | Forward | 1.06       | 20.48                         | 63        | 13.69            |           |             |
| C-SnO <sub>2</sub> | Reverse | 1.12       | 21.10                         | 78        | 18.34<br>(19.12) | 29.10     | 33.18       |
|                    | forward | 1.11       | 21.42                         | 76        | 18.17            |           |             |

## Reference

1. S. Y. Park, M. Y. Baek, Y. Ju, D. H. Kim, C. S. Moon, J. H. Noh and H. S. Jung, *The journal of physical chemistry letters*, 2018, **9**, 5460-5467.
